# Supplementary material
Source: PubMed Central journal article supplement (PMC5688003)
Supplement: NIHMS912632-supplement-Supporting_Information.pdf [file NIHMS912632-supplement-Supporting_Information.pdf]

## Supporting information

### **An improved photo-induced fluorogenic alkene-tetrazole reaction for protein labeling**

X. Shang,<sup>1</sup> R. Lai,<sup>1,3</sup> X. Song,<sup>1</sup> H. Li,<sup>1,3</sup> W. Niu,<sup>2</sup> and J. Guo<sup>1\*</sup>

1. Department of Chemistry, University of Nebraska-Lincoln, Lincoln, Nebraska, 68588, United States.

2. Department of Chemical & Biomolecular Engineering, University of Nebraska-Lincoln, Lincoln, Nebraska, 68588, United States.

3. Nebraska Center for Materials and Nanoscience, and Center for Integrated Biomolecular Communication, University of Nebraska-Lincoln, Lincoln, NE 68588, United States.

\*Corresponding Author:

Jiantao Guo (jguo4@unl.edu)

## Table of Contents

|                                      |    |
|--------------------------------------|----|
| I. Synthetic procedure.....          | 3  |
| II. Computational results .....      | 5  |
| III. Supplemental figures and tables |    |
| 1. Figure S1.....                    | 12 |
| 2. Figure S2.....                    | 13 |
| 3. Figure S3.....                    | 14 |
| 4. Figure S4.....                    | 15 |
| 5. Figure S5.....                    | 16 |
| 6. Figure S6.....                    | 17 |
| 7. Figure S7.....                    | 18 |
| 8. Table S1.....                     | 19 |
| 9. Table S2.....                     | 21 |
| IV. References.....                  | 21 |

## I. Synthetic procedures

### Synthesis of 2-(4-methoxyphenyl)-5-phenyl-2H-tetrazole (**Tz**; Figure 1 of manuscript)

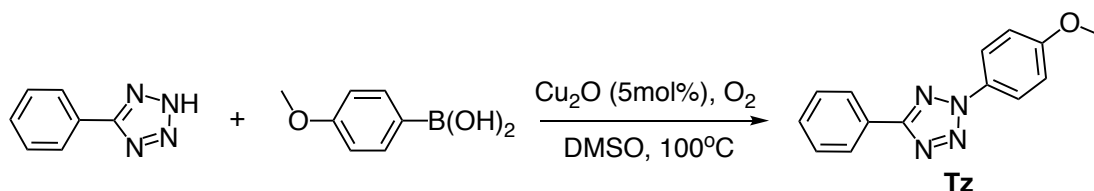

The desired tetrazole (**Tz**) was synthesized through cross-coupling reaction between 5-phenyl tetrazole and 4-methoxyphenylboronic acid by following a literature method.<sup>1</sup> A mixture of 5-phenyl tetrazole (731 mg, 5 mmol), 4-methoxyphenylboronic acid (1.36 g, 8.9 mmol), and  $\text{Cu}_2\text{O}$  (36 mg, 0.25 mmol) in 40 mL DMSO was stirred at  $100^\circ\text{C}$  under oxygen atmosphere for 5 hours. After being cooled to the room temperature, acetyl acetate (400 mL) was added. The resulting mixture was washed with 50 mL of 1N HCl and  $5 \times 50$  mL of brine. The organic layer was separated and dried over anhydrous  $\text{Na}_2\text{SO}_4$ . The solvent was removed under vacuum. The residue was purified by silica-gel flash chromatography with hexane:ethyl acetate (50:1) to afford the white product (1.135 g) with 90% yield. The  $^1\text{H-NMR}$  of the product is identical to the reported one.<sup>1</sup>  $^1\text{H-NMR}$  (400 MHz,  $\text{CDCl}_3$ )  $\delta$  ppm: 8.25 (d,  $J = 7.9$  Hz, 2H), 8.11 (d,  $J = 9.0$  Hz, 2H), 7.52 (m, 3H), 7.07 (d,  $J = 9.0$  Hz, 2H), 3.90 (s, 3H).

### General procedure to synthesize substituted pyrazoline through alkene-tetrazole reaction

In a quartz test tube, tetrazole (**Tz**; 30 mg) was dissolved in 6 mL of ethyl acetate followed by the addition of 10 eq alkene (styrene, acrylamide or hex-5-en-1-ol). The reaction mixture was irradiated with 302 nm UV (UVP, 0.16 Amps, 8 watt) at a distance of 4 cm for 2 hours. The reaction mixture was concentrated under vacuum and the product was purified by silica-gel flash chromatography.

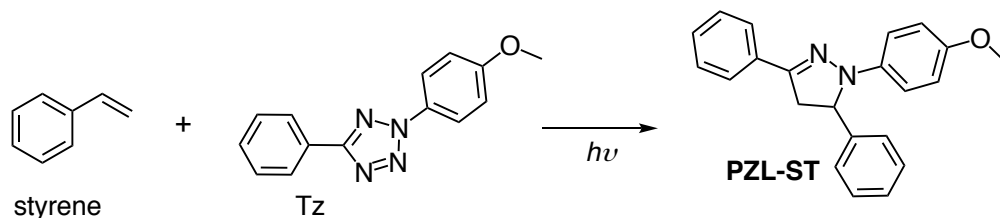

**1-(4-methoxyphenyl)-3,5-diphenyl-4,5-dihydro-1H-pyrazole (PZL-ST).**  $^1\text{H-NMR}$  (300 MHz,  $\text{CDCl}_3$ )  $\delta$  ppm: 7.71 (d,  $J = 7.2$  Hz, 2H), 7.41-7.26 (m, 8H), 7.01 (d,  $J = 8.7$  Hz, 2H), 6.76 (d,  $J = 9.3$  Hz, 2H), 5.18 (m, 1H), 3.82-3.73 (m, 1H), 3.72 (s, 3H), 3.13 (dd,  $J = 16.2, 8.4$  Hz, 1H);  $^{13}\text{C-}$

NMR (400 MHz, CDCl<sub>3</sub>) δ ppm: 153.42, 148.35, 142.85, 139.79, 132.99, 129.22, 128.64, 128.51, 127.67, 126.21, 125.73, 115.00, 114.52, 65.82, 55.72, 43.84. HRMS (ESI): [M + H]<sup>+</sup> calcd for C<sub>22</sub>H<sub>20</sub>N<sub>2</sub>O 329.1648; found 329.1626.

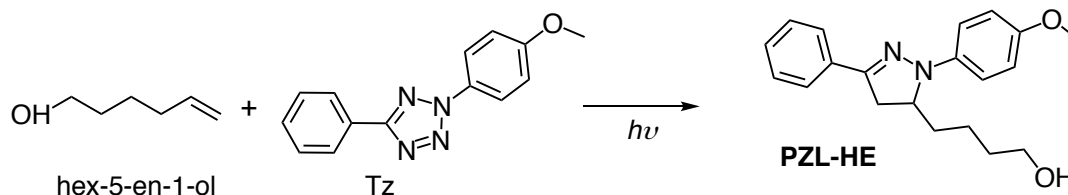

**4-(1-(4-methoxyphenyl)-3-phenyl-4,5-dihydro-1H-pyrazol-5-yl)butan-1-ol (PZL-HE).** <sup>1</sup>H-NMR (400MHz, CDCl<sub>3</sub>) δ ppm: 7.70 (d,  $J$  = 7.6 Hz, 2H), 7.37 (t,  $J$  = 7.2 Hz, 2H), 7.30 (t,  $J$  = 7.2 Hz, 1H), 7.11 (d,  $J$  = 9.2 Hz, 2H), 6.87 (d,  $J$  = 8.8 Hz, 2H), 4.28 (m, 1H), 3.80 (s, 3H), 3.63 (t,  $J$  = 6.4 Hz, 2H), 3.40 (dd,  $J$  = 16.8, 11.6 Hz, 1H), 3.13 (dd,  $J$  = 16.4, 6.0 Hz, 1H), 1.80-1.90 (m, 1H), 1.60-1.40 (m, 6H); <sup>13</sup>C-NMR (400 MHz, CDCl<sub>3</sub>) δ ppm: 153.57, 147.06, 139.28, 133.31, 128.58, 128.30, 125.60, 115.64, 114.75, 62.78, 61.29, 55.82, 38.24, 32.66, 32.30, 21.43. HRMS (ESI): [M + H]<sup>+</sup> calcd for C<sub>20</sub>H<sub>24</sub>N<sub>2</sub>O<sub>2</sub> 325.1911; found 325.1901.

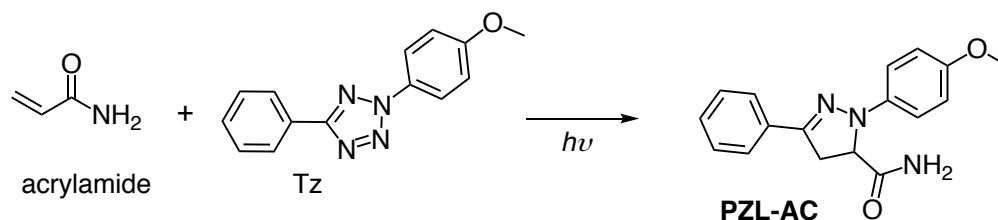

**1-(4-methoxyphenyl)-3-phenyl-4,5-dihydro-1H-pyrazole-5-carboxamide (PZL-AC).** PZL-AC<sup>2</sup> is a known molecule. It was confirmed by <sup>1</sup>H-NMR. <sup>1</sup>H-NMR (400MHz, DMSO-d<sub>6</sub>) δ ppm: 7.71 (m, 3H), 7.42 (m, 2H), 7.36 (m, 1H), 7.28 (br, 1H), 6.99 (d,  $J$  = 9.1 Hz, 2H), 6.88 (d,  $J$  = 9.1 Hz, 2H), 4.54 (dd,  $J$  = 12.6, 8.4 Hz, 1H), 3.80 (s, 3H), 3.71 (dd,  $J$  = 17.3, 12.6 Hz, 1H), 3.21 (dd,  $J$  = 17.3, 8.4 Hz, 1H).

## II. Computational Results

### Vertical excitation

**PZL-AC.** Based on the FixSol/B3LYP/6-31++G(d,p) optimized molecular geometry, the FixSol/TD-B3LYP/6-31++G(d,p) calculated lowest absorption energy is 3.070 eV (403.8 nm) for the  $S_0 \rightarrow S_1$  transition, with an oscillator strength 0.6678. The calculated wavelength 403.8 nm is about 44 nm larger than the experimental value  $\sim 360$  nm (Figure S4: PZL-AC in acetonitrile). The second lowest absorption energy is 3.984 eV (311.2 nm) for the  $S_0 \rightarrow S_2$  transition, with an oscillator strength 0.1429. This 311.2 nm absorption should be the shoulder peak at 320 nm in experiment (Figure S4: PZL-AC in acetonitrile). For  $S_0 \rightarrow S_6$ ,  $S_0 \rightarrow S_9$ ,  $S_0 \rightarrow S_{11}$  and  $S_0 \rightarrow S_{13}$ , the calculated energies are 4.064 eV (269.3 nm), 4.851 eV (255.6 nm), 4.970 eV (249.5 nm) and 5.024 eV (246.8 nm), respectively, with a combined oscillator strength 0.6599. These transitions should be the peak at  $\sim 250$  nm in experiment (Figure S4: PZL-AC in acetonitrile).

**PZL-AC-H<sup>+</sup>.** Based on the FixSol/B3LYP/6-31++G(d,p) optimized molecular geometry, the FixSol/TD-B3LYP/6-31++G(d,p) calculated lowest absorption energy for PZL-AC-H<sup>+</sup>, the protonated form of PZL-AC, is 3.083 eV (402.2 nm) for the  $S_0 \rightarrow S_1$  transition, with an oscillator strength 0.3917. The second lowest absorption energy is 3.984 eV (325.1 nm) for the  $S_0 \rightarrow S_2$  transition, with an oscillator strength 0.4075. This second transition should correspond to the  $\sim 320$  nm peak in experiment (PZL-AC in the PBS buffer, Figure S4: PZL-AC in PBS), which has an intensity comparable to the peak at  $\sim 360$  nm. In acetonitrile (Figure S4: PZL-AC in acetonitrile), this 320 nm peak appears as a shoulder. These results suggest that PZL-AC is protonated in PBS solution but not protonated in acetonitrile. For  $S_0 \rightarrow S_8$ ,  $S_0 \rightarrow S_9$  and  $S_0 \rightarrow S_{11}$ , the calculated energies are 4.968 eV (249.6 nm), 5.004 eV (247.8 nm) and 5.255 eV (235.9 nm), respectively. These transitions should be the peak at  $\sim 240$  nm in experiment (Figure S4: PZL-AC).

**PZL-HE.** Based on the FixSol/B3LYP/6-31++G(d,p) optimized molecular geometry, the FixSol/TD-B3LYP/6-31++G(d,p) calculated lowest absorption energy is 3.405 eV (364.1 nm) for the  $S_0 \rightarrow S_1$  transition, with an oscillator strength 0.7784. The calculated wavelength is in good agreement with the experimental value ( $\sim 370$  nm, Figure S4: PZL-HE in acetonitrile). For  $S_0 \rightarrow S_2$  and  $S_0 \rightarrow S_3$ , the calculated excitation energies are 4.067 eV (304.9 nm, with an oscillator strength 0.0320) and 4.223 eV (293.6 nm, with an oscillator strength as 0.0410), corresponding to the shoulder peak at  $\sim 320$  nm in experiment (Figure S4: PZL-HE in acetonitrile). For  $S_0 \rightarrow S_4$ ,

$S_0 \rightarrow S_6$ , and  $S_0 \rightarrow S_{10}$ , the calculated energies are 4.490 eV (276.1 nm), 4.661 eV (266.0 nm) and 4.985 eV (248.7 nm), respectively, with a combined oscillator strength 0.3344. These transitions should be the peak at ~260 nm in experiment (Figure S4: PZL-HE in acetonitrile).

**PZL-HE-H<sup>+</sup>**. Based on the FixSol/B3LYP/6-31++G(d,p) optimized molecular geometry, the FixSol/TD-B3LYP/6-31++G(d,p) calculated lowest absorption energy for PZL-HE-H<sup>+</sup>, the protonated form of PZL-HE, is 3.150 eV (393.6 nm) for the  $S_0 \rightarrow S_1$  transition, with an oscillator strength 0.3628. The second lowest absorption energy is 3.742 eV (331.3 nm) for the  $S_0 \rightarrow S_2$  transition, with an oscillator strength 0.4288. So, for protonated PZL-HE, the peak at ~330 nm should be comparable to the one at ~390 nm. For PZL-HE in PBS solution, the peak at ~320 nm has an intensity larger than the one at ~380 nm. While in acetonitrile, the peak at ~330 nm has a much lower intensity as compared to the one at ~390 nm. Thus, it is very likely that PZL-HE is protonated in the PBS buffer. For  $S_0 \rightarrow S_7$ ,  $S_0 \rightarrow S_8$  and  $S_0 \rightarrow S_9$ , the calculated energies are 4.867 eV (254.7 nm), 5.028 eV (246.6 nm) and 5.153 eV (240.6 nm), respectively, with a combined oscillator strength 0.4378. These transitions should be the peak at ~240 nm in experiment (Figure S4: PZL-HE).

**PZL-ST**. Based on the FixSol/B3LYP/6-31++G(d,p) optimized molecular geometry, the FixSol/TD-B3LYP/6-31++G(d,p) calculated lowest absorption energy is 3.387 eV (366.0 nm) for the  $S_0 \rightarrow S_1$  transition, with an oscillator strength 0.7695. It is in accordance with the one observed in experiment (~360 nm, Figure S4: PZL-ST in acetonitrile). For  $S_0 \rightarrow S_2$ ,  $S_0 \rightarrow S_3$ , and  $S_0 \rightarrow S_4$ , the calculated energies are 3.951 eV (313.8 nm, oscillator strength 0.0430), 4.220 eV (293.8 nm, oscillator strength 0.0401) and 4.271 eV (290.3 nm, oscillator strength 0.0395), respectively, with a combined oscillator strength 0.1226. These transitions contribute to a peak at ~300 nm, corresponding to the shoulder peak at ~300 nm in experiment (Figure S4: PZL-ST in acetonitrile). For  $S_0 \rightarrow S_6$ ,  $S_0 \rightarrow S_8$  and  $S_0 \rightarrow S_{12}$ , the calculated energies are 4.521 eV (274.2 nm), 4.713 eV (263.1 nm) and 4.958 eV (250.1 nm), respectively, with a combined oscillator strength 0.3751. These transitions should be the peak at ~260 nm in experiment (Figure S4: PZL-ST in acetonitrile).

**PZL-ST-H<sup>+</sup>**. Based on the FixSol/B3LYP/6-31++G(d,p) optimized molecular geometry, the FixSol/TD-B3LYP/6-31++G(d,p) calculated lowest absorption energy is 3.074 eV (403.3 nm) for the  $S_0 \rightarrow S_1$  transition, with an oscillator strength 0.3941. The second lowest absorption energy is 3.712 eV (334.0 nm) for the  $S_0 \rightarrow S_2$  transition, with an oscillator strength 0.3105. These two

peaks have similar oscillator strength, indicating that for protonated PZL-ST, the peak at ~330 nm should be comparable to the one at ~390 nm. For PZL-ST in PBS solution (Figure S4: PZL-ST in PBS), the case was not found in experiment: the absorption spectra of PZL-ST in PBS buffer and in acetonitrile are similar. Thus, it is likely that PZL-ST is not protonated in PBS solution, or the protonation portion is insignificant.

### **De-excitation from $S_1 \rightarrow S_0$**

The  $S_1 \rightarrow S_0$  de-excitation energy was calculated for each species using the FixSol/TDB3LYP/6-31++G(d,p) geometry optimization method. The calculated  $S_1 \rightarrow S_0$  de-excitation energies for PZL-AC, PZL-HE and PZL-ST are 2.355 eV (526.5 nm, oscillator strength 0.3105), 2.312 eV (536.2 nm, oscillator strength 0.7332) and 2.348 eV (528.0 nm, oscillator strength 0.7242), respectively. Therefore, fluorescence can be observed for all of them at ~530 nm. This is in good agreement with the experiment data (Figure 2B, in acetonitrile). For the protonated forms, PZL-AC- $H^+$ , PZL-HE- $H^+$  and PZL-ST- $H^+$ , the calculated  $S_1 \rightarrow S_0$  de-excitation energies are 0.230 eV (oscillator strength 0.0005), 0.434 eV (oscillator strength 0.0046) and 0.063 eV (oscillator strength 0.0001), respectively. These indicate that if the three molecules are protonated, there would be no observable fluorescence. Given the measured fluorescence spectrum, it is likely that PZL-AC and PZL-HE are protonated in the PBS buffer solution (with 5% DMSO), while PZL-ST is not protonated, or the protonation portion is insignificant.

### **Computational Data**

#### **PZL-AC**

##### Vertical Excitation

| STATE | ENERGY          | EXCITATION | TRANSITION DIPOLE, A.U. |         |         | OSCILLATOR |
|-------|-----------------|------------|-------------------------|---------|---------|------------|
| 0 ->  | HARTREE         | EV         | X                       | Y       | Z       | STRENGTH   |
| 0 A   | -972.2513318214 | 0.000      |                         |         |         |            |
| 1 A   | -972.1385147432 | 3.070      | 1.5514                  | 2.5439  | -0.0346 | 0.6678     |
| 2 A   | -972.1049366957 | 3.984      | -1.1197                 | -0.3678 | 0.2744  | 0.1429     |
| 3 A   | -972.1000365242 | 4.117      | 0.1421                  | -0.5717 | -0.0724 | 0.0355     |
| 4 A   | -972.0976405564 | 4.182      | 0.1633                  | 0.4919  | 0.1118  | 0.0288     |
| 5 A   | -972.0896428905 | 4.400      | -0.1198                 | 0.0435  | 0.0066  | 0.0018     |
| 6 A   | -972.0821520770 | 4.604      | 0.9763                  | 1.2277  | 0.0453  | 0.2777     |
| 7 A   | -972.0816003639 | 4.619      | -0.3799                 | -0.3576 | 0.1611  | 0.0337     |
| 8 A   | -972.0773706537 | 4.734      | -0.3608                 | 0.1639  | 0.0685  | 0.0188     |
| 9 A   | -972.0730467367 | 4.851      | -0.2419                 | 1.0721  | 0.0610  | 0.1440     |
| 10 A  | -972.0715738845 | 4.891      | -0.2491                 | -0.1413 | -0.0120 | 0.0099     |
| 11 A  | -972.0686703961 | 4.970      | -0.0843                 | -0.9800 | -0.1295 | 0.1199     |
| 12 A  | -972.0670111621 | 5.016      | -0.8170                 | 0.2094  | -0.0473 | 0.0877     |
| 13 A  | -972.0666946161 | 5.024      | -0.1259                 | -0.9363 | 0.2614  | 0.1183     |
| 14 A  | -972.0636356122 | 5.107      | -0.0047                 | 0.1009  | 0.1725  | 0.0050     |

|    |   |                 |       |         |         |         |        |
|----|---|-----------------|-------|---------|---------|---------|--------|
| 15 | A | -972.0611201894 | 5.176 | -0.2009 | -0.0466 | -0.0858 | 0.0063 |
|----|---|-----------------|-------|---------|---------|---------|--------|

### De-Excitation

| STATE | ENERGY          | EXCITATION | TRANSITION DIPOLE, A.U. |        |         | OSCILLATOR |
|-------|-----------------|------------|-------------------------|--------|---------|------------|
| 0 ->  | HARTREE         | EV         | X                       | Y      | Z       | STRENGTH   |
| 0 A   | -972.2405838181 | 0.000      |                         |        |         |            |
| 1 A   | -972.1540272475 | 2.355      | 1.7577                  | 2.9690 | -0.1104 | 0.6876     |

### PZL-HE

#### Vertical Excitation

| STATE | ENERGY           | EXCITATION | TRANSITION DIPOLE, A.U. |         |         | OSCILLATOR |
|-------|------------------|------------|-------------------------|---------|---------|------------|
| 0 ->  | HARTREE          | EV         | X                       | Y       | Z       | STRENGTH   |
| 0 A   | -1035.9531702869 | 0.000      |                         |         |         |            |
| 1 A   | -1035.8280564648 | 3.405      | 1.5576                  | 2.6124  | -0.2860 | 0.7784     |
| 2 A   | -1035.8037162956 | 4.067      | 0.4466                  | 0.0292  | 0.3482  | 0.0320     |
| 3 A   | -1035.7979857215 | 4.223      | -0.0612                 | -0.6139 | -0.1250 | 0.0410     |
| 4 A   | -1035.7881531758 | 4.490      | 0.0066                  | 1.1121  | -0.3350 | 0.1484     |
| 5 A   | -1035.7866887833 | 4.530      | 0.2834                  | 0.3879  | -0.0913 | 0.0265     |
| 6 A   | -1035.7818704086 | 4.661      | -0.7707                 | 0.1833  | -0.1737 | 0.0751     |
| 7 A   | -1035.7784677172 | 4.754      | 0.2148                  | -0.1076 | 0.0128  | 0.0067     |
| 8 A   | -1035.7738785468 | 4.879      | 0.1977                  | -0.0642 | 0.1650  | 0.0084     |
| 9 A   | -1035.7706220071 | 4.967      | 0.1058                  | 0.2965  | 0.1041  | 0.0134     |
| 10 A  | -1035.7699889861 | 4.985      | 0.2149                  | -0.8336 | -0.4084 | 0.1109     |
| 11 A  | -1035.7657033881 | 5.101      | 0.3107                  | 0.3395  | 0.1275  | 0.0285     |
| 12 A  | -1035.7642876311 | 5.140      | -0.0007                 | 0.0167  | -0.0896 | 0.0010     |
| 13 A  | -1035.7635115205 | 5.161      | -0.0936                 | 0.1498  | 0.1885  | 0.0084     |
| 14 A  | -1035.7616562347 | 5.211      | -0.4587                 | -0.0295 | -0.3990 | 0.0473     |
| 15 A  | -1035.7614292896 | 5.218      | 0.1583                  | -0.1417 | 0.2051  | 0.0111     |

#### De-Excitation

| STATE | ENERGY           | EXCITATION | TRANSITION DIPOLE, A.U. |        |         | OSCILLATOR |
|-------|------------------|------------|-------------------------|--------|---------|------------|
| 0 ->  | HARTREE          | EV         | X                       | Y      | Z       | STRENGTH   |
| 0 A   | -1035.9460642014 | 0.000      |                         |        |         |            |
| 1 A   | -1035.8610906904 | 2.312      | 1.4888                  | 3.2485 | -0.4167 | 0.7332     |

### PZL-ST

#### Vertical Excitation

| STATE | ENERGY           | EXCITATION | TRANSITION DIPOLE, A.U. |         |         | OSCILLATOR |
|-------|------------------|------------|-------------------------|---------|---------|------------|
| 0 ->  | HARTREE          | EV         | X                       | Y       | Z       | STRENGTH   |
| 0 A   | -1034.5250317831 | 0.000      |                         |         |         |            |
| 1 A   | -1034.4005672178 | 3.387      | -1.9842                 | -2.3065 | 0.1282  | 0.7695     |
| 2 A   | -1034.3798351653 | 3.951      | -0.5490                 | -0.3233 | -0.1945 | 0.0430     |
| 3 A   | -1034.3699444278 | 4.220      | 0.2953                  | -0.5291 | 0.1446  | 0.0401     |
| 4 A   | -1034.3680890158 | 4.271      | -0.2955                 | -0.5056 | -0.1861 | 0.0395     |
| 5 A   | -1034.3663148028 | 4.319      | 0.0859                  | -0.3068 | 0.1342  | 0.0126     |
| 6 A   | -1034.3588758382 | 4.521      | 0.7507                  | 0.9291  | -0.1190 | 0.1596     |
| 7 A   | -1034.3574518665 | 4.560      | 0.3027                  | -0.3497 | -0.0447 | 0.0241     |



|    |   |                  |       |         |         |         |        |
|----|---|------------------|-------|---------|---------|---------|--------|
| 8  | A | -1034.3518450343 | 4.713 | -0.6469 | 0.7438  | 0.0731  | 0.1128 |
| 9  | A | -1034.3488183034 | 4.795 | -0.0891 | 0.1329  | 0.1372  | 0.0052 |
| 10 | A | -1034.3482201226 | 4.811 | 0.2562  | -0.0854 | 0.1229  | 0.0104 |
| 11 | A | -1034.3438936803 | 4.929 | -0.2475 | 0.0171  | -0.1284 | 0.0094 |
| 12 | A | -1034.3428401070 | 4.958 | -0.0273 | 0.8238  | 0.4080  | 0.1027 |
| 13 | A | -1034.3396194446 | 5.045 | -0.2434 | -0.4414 | -0.2997 | 0.0425 |
| 14 | A | -1034.3389061726 | 5.065 | -0.2108 | -0.3124 | -0.0504 | 0.0179 |
| 15 | A | -1034.3361708332 | 5.139 | -0.0765 | -0.1637 | -0.1428 | 0.0067 |

### De-Excitation

| STATE | ENERGY           | EXCITATION | TRANSITION DIPOLE, A.U. |         |        | OSCILLATOR |
|-------|------------------|------------|-------------------------|---------|--------|------------|
| 0 ->  | HARTREE          | EV         | X                       | Y       | Z      | STRENGTH   |
| 0 A   | -1034.5170715493 | 0.000      |                         |         |        |            |
| 1 A   | -1034.4307746563 | 2.348      | -1.9361                 | -2.9709 | 0.1168 | 0.7242     |

### PZL-AC-H<sup>+</sup>

#### Vertical Excitation

| STATE | ENERGY          | EXCITATION | TRANSITION DIPOLE, A.U. |         |         | OSCILLATOR |
|-------|-----------------|------------|-------------------------|---------|---------|------------|
| 0 ->  | HARTREE         | EV         | X                       | Y       | Z       | STRENGTH   |
| 0 A   | -972.6931104132 | 0.000      |                         |         |         |            |
| 1 A   | -972.5797940343 | 3.083      | 1.4748                  | 1.7323  | -0.0953 | 0.3917     |
| 2 A   | -972.5529531329 | 3.814      | -1.6707                 | -1.2442 | 0.1468  | 0.4075     |
| 3 A   | -972.5412102056 | 4.133      | 0.0295                  | 0.7742  | 0.3069  | 0.0703     |
| 4 A   | -972.5409730304 | 4.140      | -0.1217                 | 0.0307  | 0.2568  | 0.0083     |
| 5 A   | -972.5304796191 | 4.425      | 0.6301                  | 0.6309  | -0.0809 | 0.0869     |
| 6 A   | -972.5219311324 | 4.658      | 0.0098                  | 0.2209  | -0.0038 | 0.0056     |
| 7 A   | -972.5190591682 | 4.736      | -0.5665                 | 0.1624  | -0.4665 | 0.0655     |
| 8 A   | -972.5105488215 | 4.968      | -0.6673                 | 0.5642  | 0.3010  | 0.1040     |
| 9 A   | -972.5092295350 | 5.004      | 0.4817                  | 0.9194  | 0.0521  | 0.1324     |
| 10 A  | -972.5073123250 | 5.056      | 0.0121                  | -0.6421 | 0.2968  | 0.0620     |
| 11 A  | -972.5000058864 | 5.255      | -0.1120                 | -0.9089 | 0.0254  | 0.1081     |
| 12 A  | -972.4962350137 | 5.357      | -0.0752                 | -0.3123 | 0.0747  | 0.0143     |
| 13 A  | -972.4914905585 | 5.486      | -0.1326                 | -0.1135 | -0.0410 | 0.0043     |
| 14 A  | -972.4900251537 | 5.526      | 0.0275                  | -0.2096 | 0.1037  | 0.0075     |
| 15 A  | -972.4854042993 | 5.652      | -0.0683                 | -0.7125 | -0.3234 | 0.0854     |

### De-Excitation

| STATE | ENERGY          | EXCITATION | TRANSITION DIPOLE, A.U. |        |        | OSCILLATOR |
|-------|-----------------|------------|-------------------------|--------|--------|------------|
| 0 ->  | HARTREE         | EV         | X                       | Y      | Z      | STRENGTH   |
| 0 A   | -972.6370493426 | 0.000      |                         |        |        |            |
| 1 A   | -972.6285864454 | 0.230      | 0.2260                  | 0.1645 | 0.1120 | 0.0005     |

### PZL-HE-H<sup>+</sup>

#### Vertical Excitation

| STATE | ENERGY  | EXCITATION | TRANSITION DIPOLE, A.U. |   |   | OSCILLATOR |
|-------|---------|------------|-------------------------|---|---|------------|
| 0 ->  | HARTREE | EV         | X                       | Y | Z | STRENGTH   |

|    |   |                  |       |         |         |         |        |
|----|---|------------------|-------|---------|---------|---------|--------|
| 0  | A | -1036.4029005806 | 0.000 |         |         |         |        |
| 1  | A | -1036.2871382889 | 3.150 | 1.1339  | 1.8465  | -0.0801 | 0.3628 |
| 2  | A | -1036.2653680080 | 3.742 | -1.4129 | -1.6364 | 0.0543  | 0.4288 |
| 3  | A | -1036.2499799760 | 4.161 | -0.1231 | 0.7522  | -0.0387 | 0.0594 |
| 4  | A | -1036.2496837733 | 4.169 | 0.2558  | -0.3156 | -0.1170 | 0.0183 |
| 5  | A | -1036.2394391666 | 4.448 | 0.1974  | 0.2343  | -0.0052 | 0.0102 |
| 6  | A | -1036.2267327817 | 4.794 | 0.3823  | -0.0308 | 0.6911  | 0.0734 |
| 7  | A | -1036.2240331815 | 4.867 | 0.9789  | 0.4481  | -0.0853 | 0.1391 |
| 8  | A | -1036.2181227254 | 5.028 | -0.0516 | 1.1319  | -0.0212 | 0.1582 |
| 9  | A | -1036.2135188079 | 5.153 | -0.0412 | 1.0005  | -0.3313 | 0.1405 |
| 10 | A | -1036.2045875146 | 5.396 | -0.1178 | -0.0520 | -0.1832 | 0.0066 |
| 11 | A | -1036.2040563080 | 5.411 | 0.1042  | -0.0533 | -0.0378 | 0.0020 |
| 12 | A | -1036.1990021324 | 5.548 | 0.1872  | -0.5038 | -0.0775 | 0.0401 |
| 13 | A | -1036.1975130678 | 5.589 | 0.0235  | -0.0581 | -0.0101 | 0.0006 |
| 14 | A | -1036.1958692861 | 5.634 | 0.1123  | 1.1845  | -0.0939 | 0.1966 |
| 15 | A | -1036.1947746163 | 5.663 | 0.3142  | 0.0262  | -0.1130 | 0.0156 |

### De-Excitation

| STATE | ENERGY           | EXCITATION | TRANSITION DIPOLE, A.U. |         |        | OSCILLATOR |
|-------|------------------|------------|-------------------------|---------|--------|------------|
| 0 ->  | HARTREE          | EV         | X                       | Y       | Z      | STRENGTH   |
| 0 A   | -1036.3393236836 | 0.000      |                         |         |        |            |
| 1 A   | -1036.3233775574 | 0.434      | -0.3110                 | -0.5046 | 0.2893 | 0.0046     |

### PZL-ST-H<sup>+</sup>

### Vertical Excitation

| STATE | ENERGY           | EXCITATION | TRANSITION DIPOLE, A.U. |         |         | OSCILLATOR |
|-------|------------------|------------|-------------------------|---------|---------|------------|
| 0 ->  | HARTREE          | EV         | X                       | Y       | Z       | STRENGTH   |
| 0 A   | -1034.9722793555 | 0.000      |                         |         |         |            |
| 1 A   | -1034.8593251480 | 3.074      | -1.5036                 | -1.7241 | 0.0161  | 0.3941     |
| 2 A   | -1034.8358800898 | 3.712      | 1.5141                  | 1.0492  | -0.1446 | 0.3105     |
| 3 A   | -1034.8272103981 | 3.948      | -0.9280                 | -0.7570 | 0.0070  | 0.1387     |
| 4 A   | -1034.8246962390 | 4.016      | -0.1869                 | -0.3767 | 0.0278  | 0.0175     |
| 5 A   | -1034.8199188713 | 4.146      | -0.0456                 | 0.7948  | 0.2732  | 0.0720     |
| 6 A   | -1034.8189377192 | 4.173      | -0.0801                 | -0.1365 | -0.1604 | 0.0052     |
| 7 A   | -1034.7991447871 | 4.711      | -0.5700                 | 0.0356  | -0.4740 | 0.0636     |
| 8 A   | -1034.7931659241 | 4.874      | -0.6887                 | 0.5353  | 0.0505  | 0.0911     |
| 9 A   | -1034.7925744289 | 4.890      | -0.7057                 | -0.6640 | 0.2838  | 0.1221     |
| 10 A  | -1034.7892830967 | 4.980      | -0.2197                 | -0.8341 | -0.2598 | 0.0990     |
| 11 A  | -1034.7832713421 | 5.143      | -0.0054                 | 0.9085  | -0.0410 | 0.1042     |
| 12 A  | -1034.7824744815 | 5.165      | 0.1495                  | -0.7435 | -0.0001 | 0.0728     |
| 13 A  | -1034.7792189571 | 5.253      | -0.2014                 | -0.0446 | 0.1513  | 0.0084     |
| 14 A  | -1034.7751008733 | 5.365      | 0.0570                  | -0.0305 | -0.0668 | 0.0011     |
| 15 A  | -1034.7740298348 | 5.395      | -0.1226                 | 0.3276  | -0.0463 | 0.0165     |

### De-Excitation

| STATE | ENERGY | EXCITATION | TRANSITION DIPOLE, A.U. |  |  | OSCILLATOR |
|-------|--------|------------|-------------------------|--|--|------------|
|-------|--------|------------|-------------------------|--|--|------------|

| 0 -> | HARTREE          | EV    | X      | Y       | Z      | STRENGTH |
|------|------------------|-------|--------|---------|--------|----------|
| 0 A  | -1034.9015335012 | 0.000 |        |         |        |          |
| 1 A  | -1034.8992584506 | 0.062 | 0.1477 | -0.1137 | 0.1980 | 0.0001   |

### III. Supplemental figures and tables

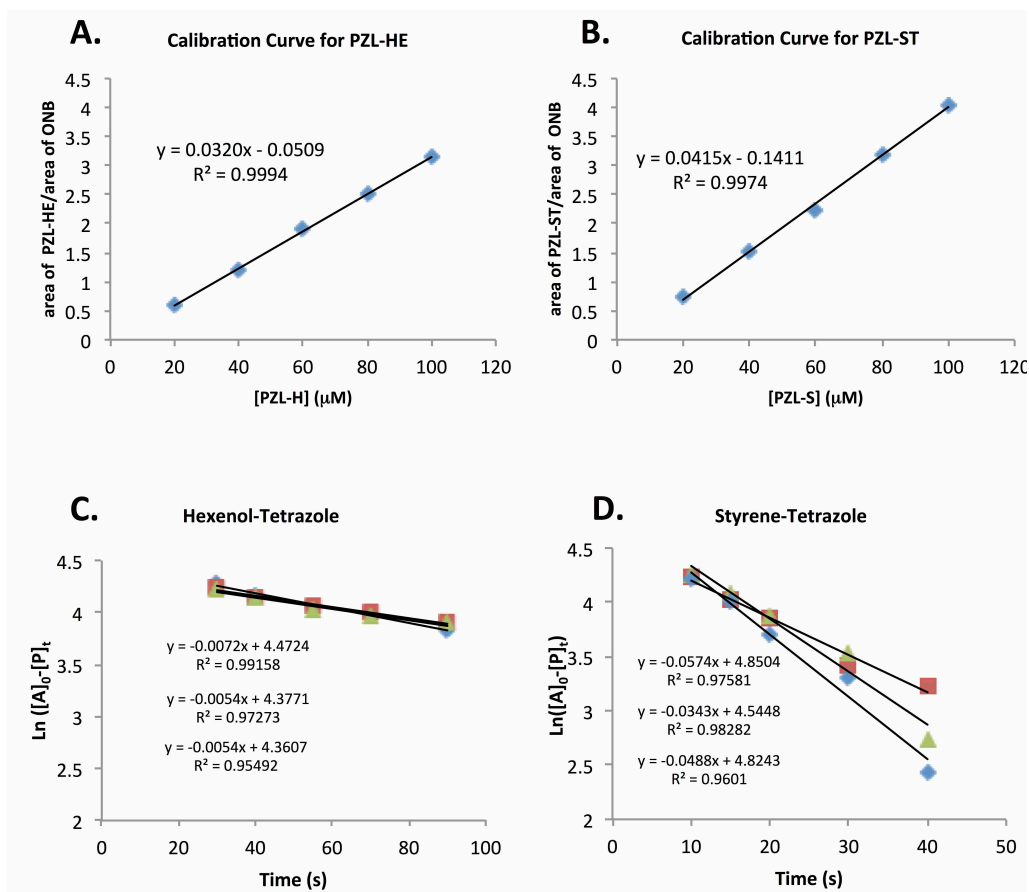

**Figure S1. Kinetic studies of alkene-tetrazole reaction.** Reactions were carried out in ACN/PBS (1:1) and irradiated at 302 nm using a handheld UV lamp. Internal reference was 2-nitrobenzyl alcohol (ONB). (A) Calibration curve of purified pyrazoline PZL-HE formed from a reaction between 5-hexen-1-ol and tetrazole; (B) Calibration curve of purified pyrazoline PZL-ST formed from a reaction between styrene and tetrazole; (C) Kinetic measurement of the reaction between tetrazole and 5-hexen-1-ol; (D) Kinetic measurement of the reaction between tetrazole and styrene.

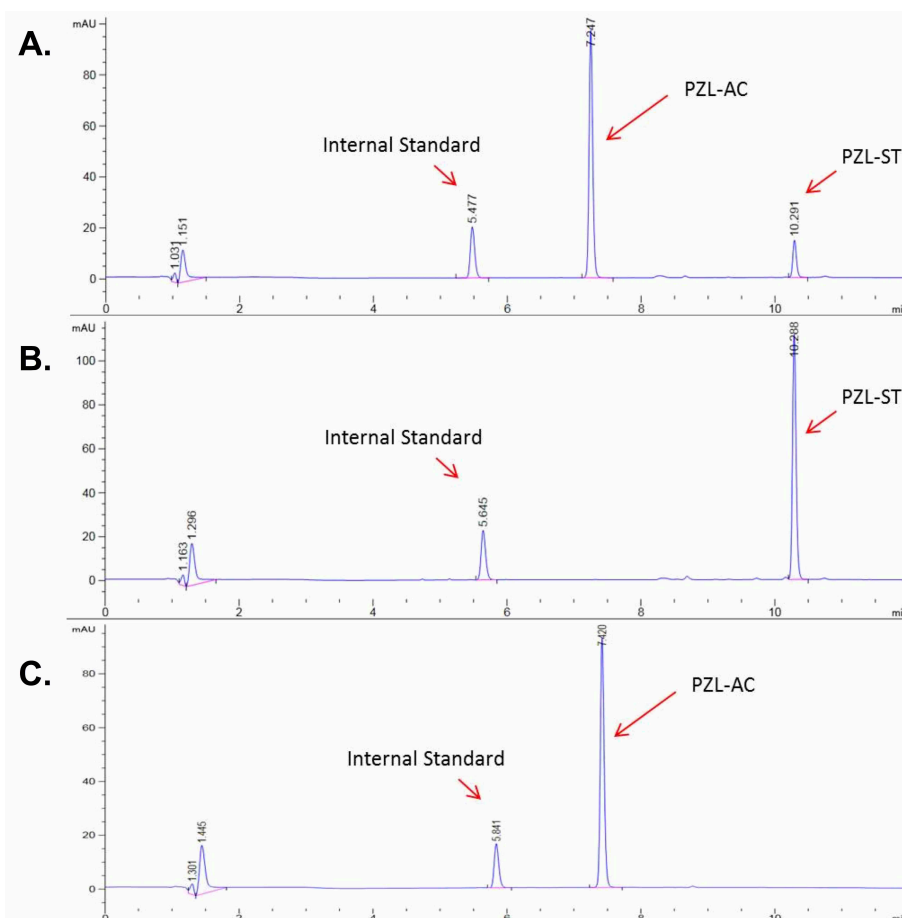

**Figure S2. Competitive study of acrylamide and styrene in the 1,3-cycloaddition reaction with tetrazole.** Reactions were carried out with 0.1 mM tetrazole and 10 mM alkenes in acetonitrile/PBS (1/1) under 302 nm irradiation for 2 minutes. 2-Nitrobenzyl alcohol (ONB, 0.5 mM) was used as internal standard. (A) Styrene (10 mM) and acrylamide (10 mM); (B) Styrene (10 mM) only; (C) Acrylamide (10 mM) only. Based on the area ratio relative to the internal standard, around 84% PZL-AC and 16% PZL-ST were formed in the competitive reaction (A).

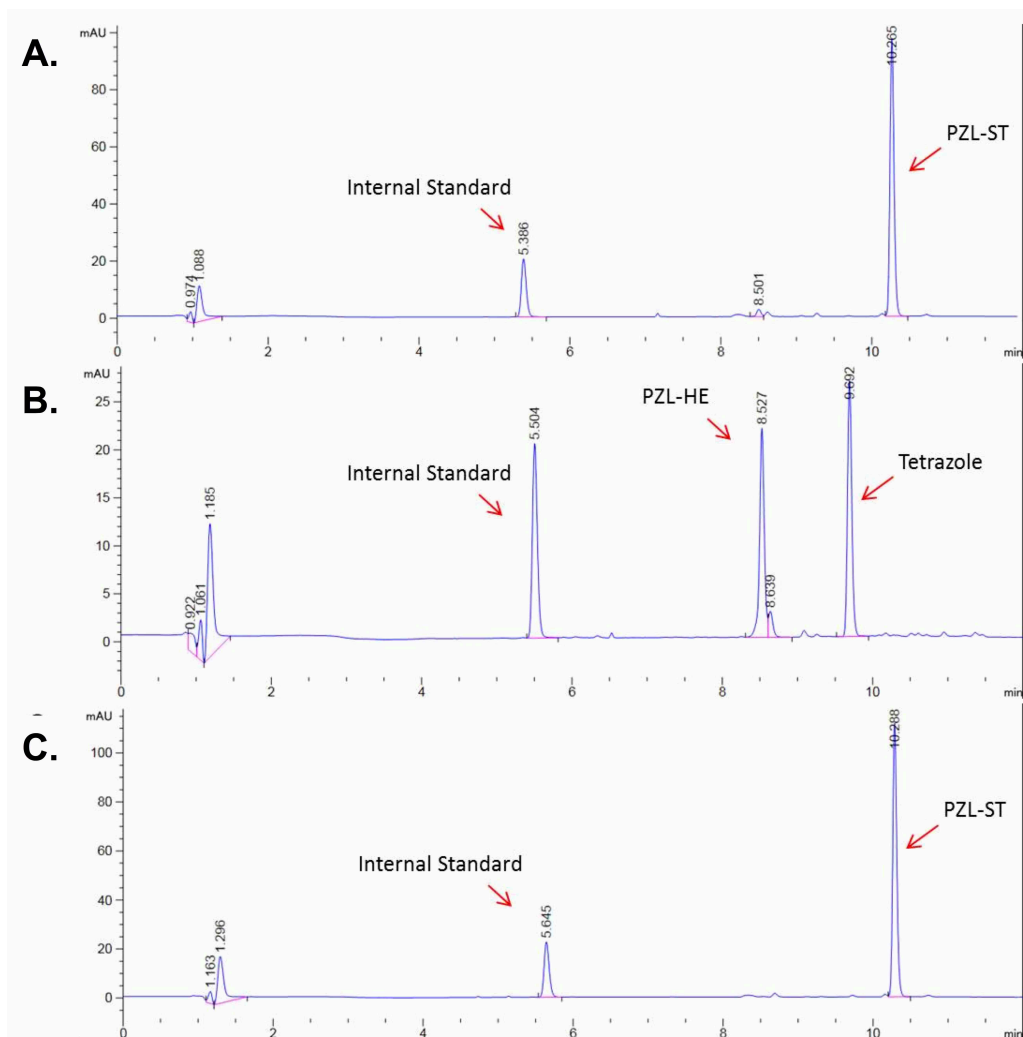

**Figure S3. Competitive study of 5-hexen-1-ol and styrene in the 1,3-cycloaddition with the tetrazole.** Reactions were carried out with 0.1 mM tetrazole and 10 mM alkenes in acetonitrile/PBS (1/1) under 302 nm irradiation for 2 minutes. 2-Nitrobenzyl alcohol (ONB, 0.5 mM) was used as internal standard. (A) Styrene (10 mM) and 5-hexen-1-ol (10 mM); (B) 5-Hexen-1-ol (10 mM) only; (C) Styrene (10 mM) only. Nearly 100% PZL-ST was formed in the competitive reaction (A).

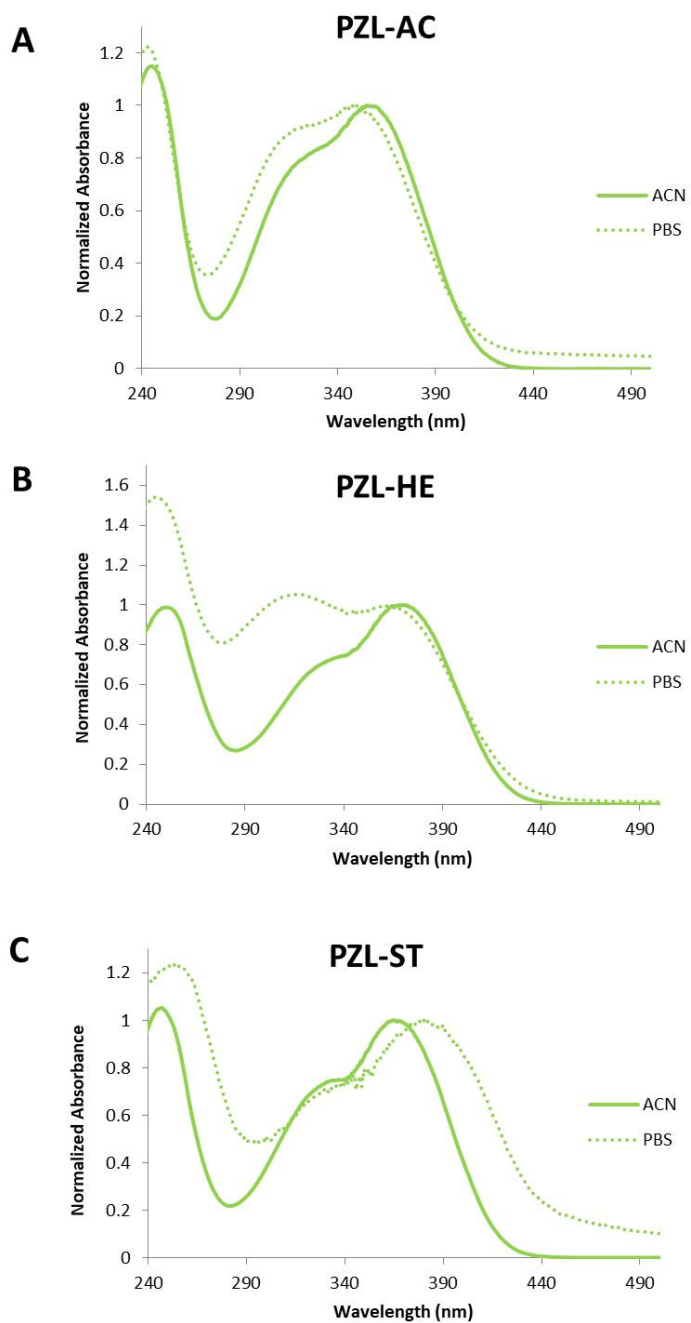

**Figure S4. Absorption spectra of pyrazolines.** Dashed lines: in PBS buffer (pH 7.4, 5% DMSO); Solid lines: in acetonitrile.

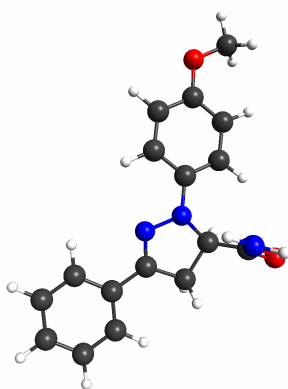

**PZL-AC**

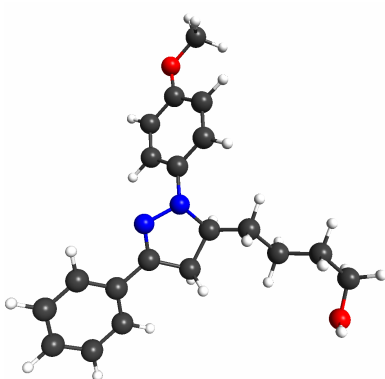

**PZL-HE**

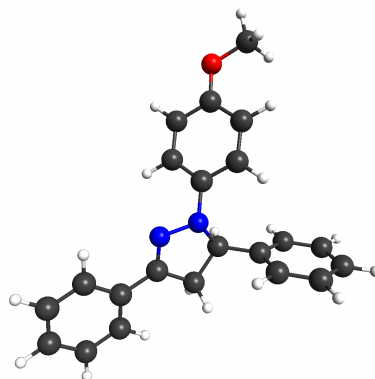

**PZL-ST**

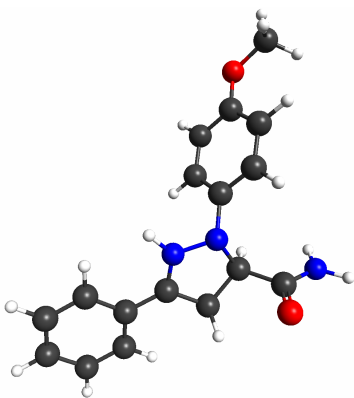

**PZL-AC-H<sup>+</sup>**

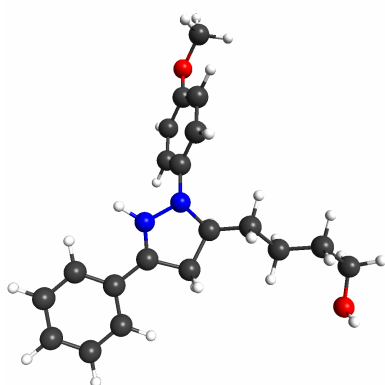

**PZL-HE-H<sup>+</sup>**

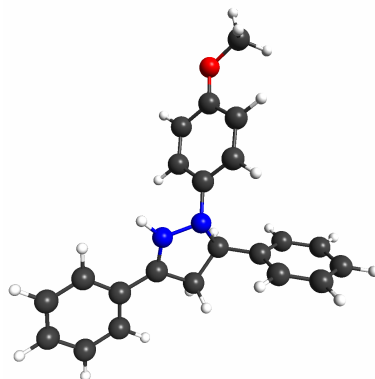

**PZL-ST-H<sup>+</sup>**

**Figure S5. B3LYP/FixSol optimized structures.**



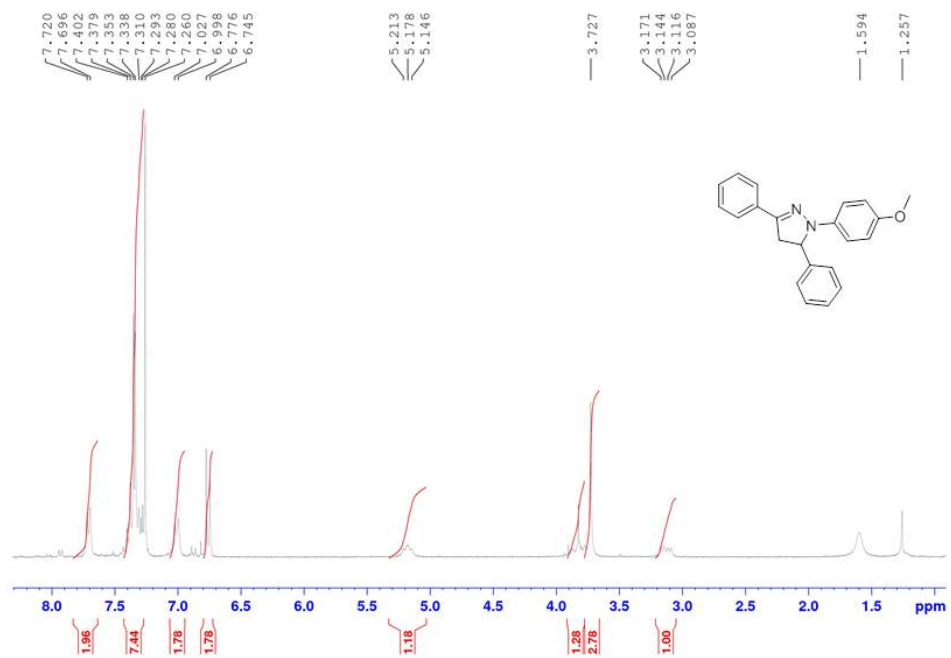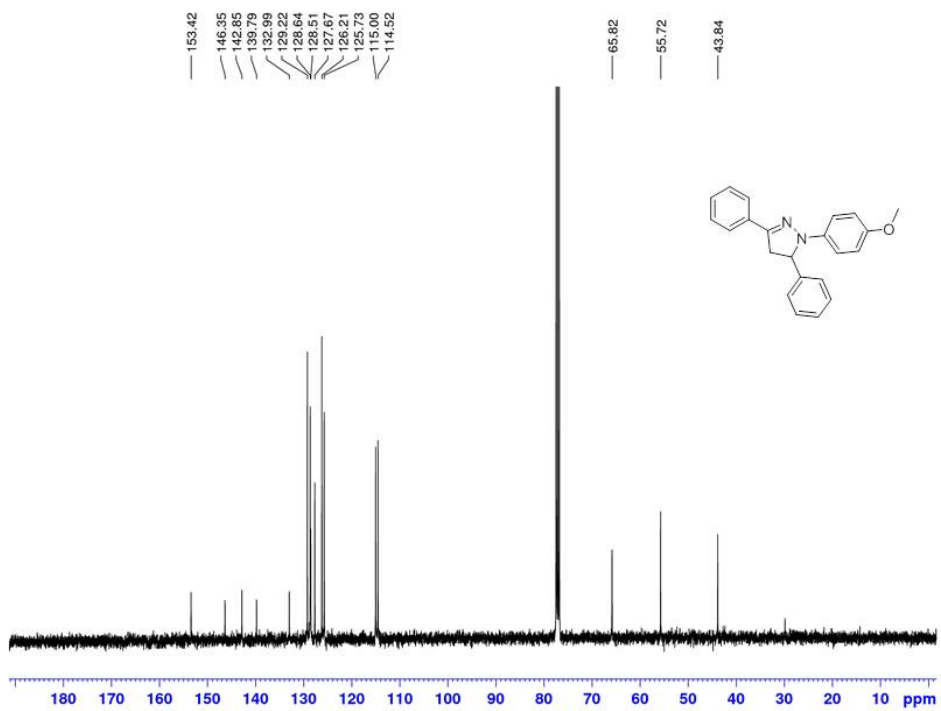

Figure S6 <sup>1</sup>H-NMR and <sup>13</sup>C-NMR of PZL-ST.

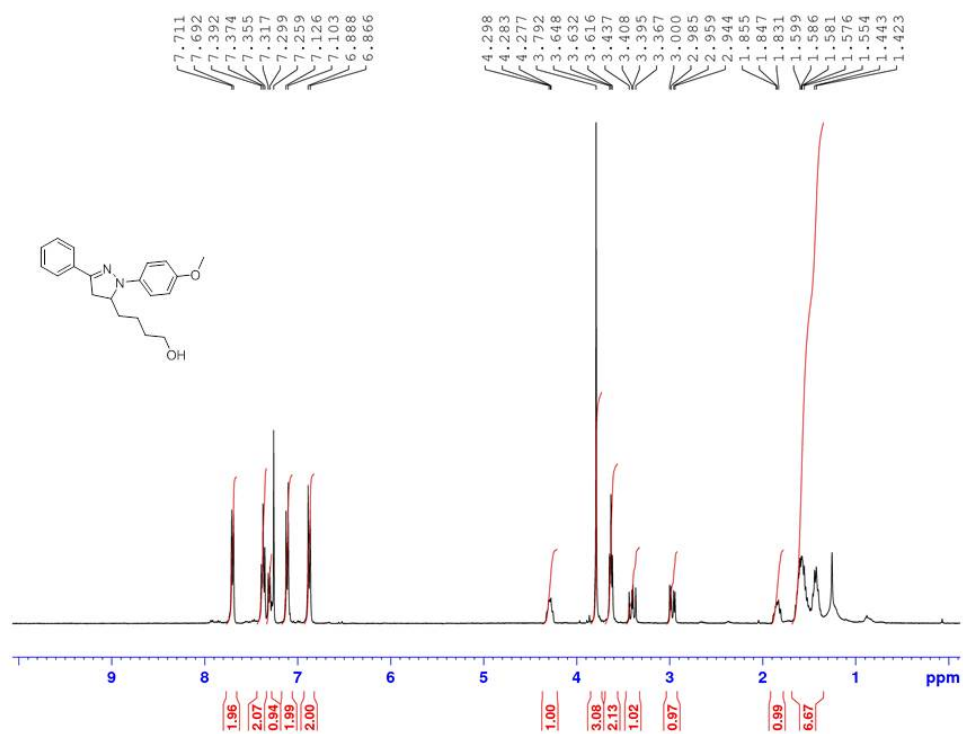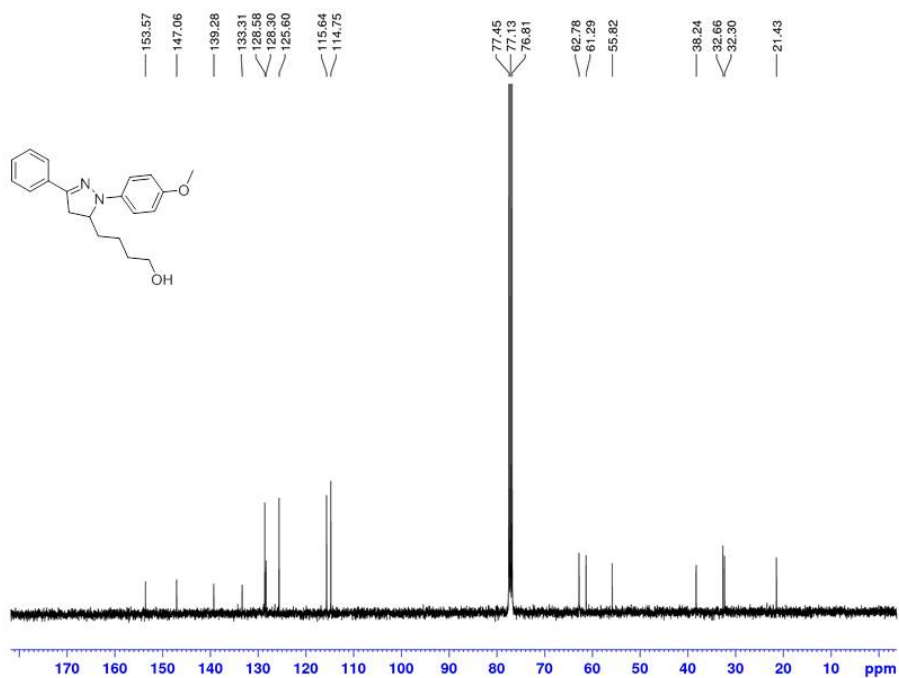

Figure S7 <sup>1</sup>H-NMR and <sup>13</sup>C-NMR of PZL-HE.

**Table S1. Vertical excitation energies of pyrazolines and protonated pyrazolines. The absorption spectra range from 240 nm to 400 nm.**

| Molecule              | Absorption (eV)                  | Oscillator strength | Wavelength (nm) |
|-----------------------|----------------------------------|---------------------|-----------------|
| PZL-AC                | $S_0 \rightarrow S_1$ : 3.070    | 0.6678              | 403.8           |
|                       | $S_0 \rightarrow S_2$ : 3.984    | 0.1429              | 311.2           |
|                       | $S_0 \rightarrow S_6$ : 4.604    | 0.2777              | 269.3           |
|                       | $S_0 \rightarrow S_9$ : 4.851    | 0.1440              | 255.6           |
|                       | $S_0 \rightarrow S_{11}$ : 4.970 | 0.1199              | 249.5           |
|                       | $S_0 \rightarrow S_{13}$ : 5.024 | 0.1183              | 246.8           |
| PZL-AC-H <sup>+</sup> | $S_0 \rightarrow S_1$ : 3.083    | 0.3917              | 402.2           |
|                       | $S_0 \rightarrow S_2$ : 3.814    | 0.4075              | 325.1           |
|                       | $S_0 \rightarrow S_8$ : 4.968    | 0.1040              | 249.6           |
|                       | $S_0 \rightarrow S_9$ : 5.004    | 0.1324              | 247.8           |
|                       | $S_0 \rightarrow S_{11}$ : 5.004 | 0.1081              | 235.9           |
| PZL-HE                | $S_0 \rightarrow S_1$ : 3.405    | 0.7784              | 364.1           |
|                       | $S_0 \rightarrow S_2$ : 4.067    | 0.0320              | 304.9           |
|                       | $S_0 \rightarrow S_3$ : 4.223    | 0.0410              | 293.6           |
|                       | $S_0 \rightarrow S_4$ : 4.490    | 0.1484              | 276.1           |
|                       | $S_0 \rightarrow S_6$ : 4.661    | 0.0751              | 266.0           |
|                       | $S_0 \rightarrow S_{10}$ : 4.985 | 0.1109              | 248.7           |
| PZL-HE-H <sup>+</sup> | $S_0 \rightarrow S_1$ : 3.150    | 0.3628              | 393.6           |
|                       | $S_0 \rightarrow S_2$ : 3.742    | 0.4288              | 331.3           |
|                       | $S_0 \rightarrow S_7$ : 4.867    | 0.1391              | 254.7           |
|                       | $S_0 \rightarrow S_8$ : 5.028    | 0.1582              | 246.6           |
|                       | $S_0 \rightarrow S_9$ : 5.153    | 0.1405              | 240.6           |
| PZL-ST                | $S_0 \rightarrow S_1$ : 3.387    | 0.7695              | 366.0           |
|                       | $S_0 \rightarrow S_2$ : 3.951    | 0.0430              | 313.8           |
|                       | $S_0 \rightarrow S_3$ : 4.220    | 0.0401              | 293.8           |
|                       | $S_0 \rightarrow S_4$ : 4.271    | 0.0395              | 290.3           |
|                       | $S_0 \rightarrow S_6$ : 4.521    | 0.1596              | 274.2           |

|                       |                                 |        |       |
|-----------------------|---------------------------------|--------|-------|
|                       | $S_0 \rightarrow S_8: 4.713$    | 0.1128 | 263.1 |
|                       | $S_0 \rightarrow S_{12}: 4.958$ | 0.1027 | 250.1 |
| PZL-ST-H <sup>+</sup> | $S_0 \rightarrow S_1: 3.074$    | 0.3941 | 403.3 |
|                       | $S_0 \rightarrow S_2: 3.712$    | 0.3105 | 334.0 |
|                       | $S_0 \rightarrow S_3: 3.948$    | 0.1387 | 314.0 |
|                       | $S_0 \rightarrow S_9: 4.890$    | 0.1221 | 253.5 |
|                       | $S_0 \rightarrow S_{11}: 5.143$ | 0.1042 | 241.1 |

**Table S2. De-excitation energy from  $S_1 \rightarrow S_0$  of pyrazolines and protonated pyrazolines.**

| Molecule              | Emission ( $S_1 \rightarrow S_0$ , eV) | Oscillator strength | Wavelength (nm) |
|-----------------------|----------------------------------------|---------------------|-----------------|
| PZL-AC                | 2.355                                  | 0.6876              | 526.5           |
| PZL-AC-H <sup>+</sup> | 0.230                                  | 0.0005              | N/A             |
| PZL-HE                | 2.312                                  | 0.7332              | 536.2           |
| PZL-HE-H <sup>+</sup> | 0.434                                  | 0.0046              | N/A             |
| PZL-ST                | 2.348                                  | 0.7242              | 528.0           |
| PZL-ST-H <sup>+</sup> | 0.063                                  | 0.0001              | N/A             |

#### IV. References

1. Li, Y., Gao, L.-X., and Han, F.-S. (2012) Efficient synthesis of 2,5-disubstituted tetrazoles via the Cu<sub>2</sub>O-catalyzed aerobic oxidative direct cross-coupling of N-H free tetrazoles with boronic acids. *Chem. Commun.* 48, 2719-2721.
2. Yu, Z., Pan, Y., Wang, Z., Wang, J., and Lin, Q. (2012) Genetically encoded cyclopropene directs rapid, photoclick-chemistry-mediated protein labeling in mammalian cells. *Angew. Chem., Int. Ed.* 51, 10600-10604.
